# Supplementary material for: The Costs, Benefits and Human Behaviours for Antimicrobial Use in Small Commercial Broiler Chicken Systems in Indonesia
Source: PubMed Central journal article supplement (PMC7235826; doi:10.3390/antibiotics9040154), 2020-04-01
Supplement: antibiotics-09-00154-s001.pdf [file antibiotics-09-00154-s001.pdf]

## Supplementary Material

**Table S1.** Univariate Chi-squared analysis comparing the independent and contract farmers' opinions on AMR and antimicrobial use practices in broilers in Indonesia.

|                                                                                                                  |                                | Independent farmer | Contract farmer | Chi-squared<br><i>p</i> -value |
|------------------------------------------------------------------------------------------------------------------|--------------------------------|--------------------|-----------------|--------------------------------|
| <b>Ability to correctly define AMR</b>                                                                           |                                |                    |                 |                                |
| <b>Knowledge on AMR definition</b>                                                                               | Unable to correctly define AMR | 117 (52.7%)        | 173 (61.6%)     | <b>0.046</b>                   |
|                                                                                                                  | Able to correctly define AMR   | 105 (47.3%)        | 108 (38.4%)     |                                |
| <b>The importance of AMR concerns and the role of antimicrobial use in broilers</b>                              |                                |                    |                 |                                |
| <b>AMR will never be a problem on my farm</b>                                                                    | Disagree                       | 70 (31.7%)         | 100 (35.8%)     | 0.605                          |
|                                                                                                                  | Neutral                        | 82 (37.1%)         | 95 (34.1%)      |                                |
|                                                                                                                  | Agreed                         | 69 (31.2%)         | 84 (30.1%)      |                                |
| <b>AMR is a major human health concern in Indonesia</b>                                                          | Disagree                       | 29 (13.1%)         | 38 (13.6%)      | 0.987                          |
|                                                                                                                  | Neutral                        | 75 (33.9%)         | 94 (33.7%)      |                                |
|                                                                                                                  | Agreed                         | 117 (52.9%)        | 147 (52.7%)     |                                |
| <b>Chickens are healthier if more antimicrobials are used</b>                                                    | Disagree                       | 120 (54.3%)        | 101 (36.1%)     | <b>&lt;0.001</b>               |
|                                                                                                                  | Neutral                        | 46 (20.8%)         | 91 (32.7%)      |                                |
|                                                                                                                  | Agreed                         | 55 (24.9%)         | 87 (31.1%)      |                                |
| <b>Antimicrobials used in chickens can affect the health of the consumer</b>                                     | Disagree                       | 23 (10.4%)         | 29 (10.4%)      | 0.648                          |
|                                                                                                                  | Neutral                        | 73 (33.0%)         | 103 (36.9%)     |                                |
|                                                                                                                  | Agreed                         | 125 (56.6%)        | 147 (52.7%)     |                                |
| <b>Antimicrobial use in animals should be reduced</b>                                                            | Disagree                       | 15 (6.8%)          | 41 (14.7%)      | <b>&lt;0.001</b>               |
|                                                                                                                  | Neutral                        | 39 (17.6%)         | 104 (37.3%)     |                                |
|                                                                                                                  | Agreed                         | 167 (75.6%)        | 134 (48.0%)     |                                |
| <b>Antimicrobial use in humans should be reduced</b>                                                             | Disagree                       | 9 (4.1%)           | 26 (9.4%)       | <b>&lt;0.001</b>               |
|                                                                                                                  | Neutral                        | 35 (15.9%)         | 93 (33.5%)      |                                |
|                                                                                                                  | Agreed                         | 176 (80.0%)        | 159 (57.2%)     |                                |
| <b>Indiscriminate use of antimicrobials can lead to AMR</b>                                                      | Disagree                       | 12 (5.4%)          | 26 (9.4%)       | 0.26                           |
|                                                                                                                  | Neutral                        | 75 (33.9%)         | 91 (32.7%)      |                                |
|                                                                                                                  | Agreed                         | 134 (60.6%)        | 161 (57.9%)     |                                |
| <b>Many antimicrobials are not effective at treating disease in chickens</b>                                     | Disagree                       | 40 (18.1%)         | 60 (21.8%)      | <b>0.014</b>                   |
|                                                                                                                  | Neutral                        | 72 (32.6%)         | 115 (41.8%)     |                                |
|                                                                                                                  | Agreed                         | 109 (49.3%)        | 100 (36.4%)     |                                |
| <b>Indiscriminate use of antimicrobials in chickens is expensive for farmers</b>                                 | Disagree                       | 6 (2.7%)           | 14 (5.1%)       | <b>&lt;0.001</b>               |
|                                                                                                                  | Neutral                        | 24 (10.9%)         | 73 (25.6%)      |                                |
|                                                                                                                  | Agreed                         | 190 (86.4%)        | 188 (68.4%)     |                                |
| <b>There is a need for sufficient withdrawal time after antimicrobial use before selling birds for slaughter</b> | Disagree                       | 5 (2.3%)           | 6 (2.2%)        | <b>0.001</b>                   |
|                                                                                                                  | Neutral                        | 26 (11.8%)         | 68 (25.1%)      |                                |
|                                                                                                                  | Agreed                         | 189 (85.9%)        | 199 (74.4%)     |                                |
| <b>Drivers for antimicrobial use in broiler flock</b>                                                            |                                |                    |                 |                                |
| <b>To prevent disease in the flock</b>                                                                           | Less likely                    | 51 (23.4%)         | 45 (16.2%)      | <b>0.036</b>                   |
|                                                                                                                  | Neutral                        | 94 (43.1%)         | 112 (40.3%)     |                                |
|                                                                                                                  | More likely                    | 73 (33.5%)         | 121 (43.5%)     |                                |

|                                                                                                   |               |             |             |              |
|---------------------------------------------------------------------------------------------------|---------------|-------------|-------------|--------------|
| <b>An increased mortality rate</b>                                                                | Less likely   | 32 (14.7%)  | 37 (13.3%)  | 0.872        |
|                                                                                                   | Neutral       | 70 (32.1%)  | 94 (33.8%)  |              |
|                                                                                                   | More likely   | 116 (53.2%) | 147 (52.9%) |              |
| <b>The chickens are not eating</b>                                                                | Less likely   | 35 (16.1%)  | 42 (15.1%)  | 0.944        |
|                                                                                                   | Neutral       | 106 (48.6%) | 139 (49.8%) |              |
|                                                                                                   | More likely   | 77 (35.3%)  | 98 (35.1%)  |              |
| <b>To improve productivity and growth in the flock</b>                                            | Less likely   | 43 (19.7%)  | 36 (12.9%)  | 0.064        |
|                                                                                                   | Neutral       | 125 (57.3%) | 161 (57.7%) |              |
|                                                                                                   | More likely   | 50 (22.9%)  | 82 (29.4%)  |              |
| <b>Advised by drug seller to use antimicrobials</b>                                               | Less likely   | 23 (10.6%)  | 39 (14.1%)  | 0.075        |
|                                                                                                   | Neutral       | 131 (60.1%) | 180 (65.0%) |              |
|                                                                                                   | More likely   | 64 (29.4%)  | 58 (20.9%)  |              |
| <b>Advised by the veterinarian or para-veterinarian to use antimicrobials</b>                     | Less likely   | 22 (10.1%)  | 21 (7.6%)   | 0.603        |
|                                                                                                   | Neutral       | 111 (50.9%) | 144 (51.8%) |              |
|                                                                                                   | More likely   | 85 (39.0%)  | 113 (40.6%) |              |
| <b>Advised by the production company to use antimicrobials</b>                                    | Less likely   | 26 (11.9%)  | 25 (9.0%)   | <0.001       |
|                                                                                                   | Neutral       | 148 (67.9%) | 115 (41.5%) |              |
|                                                                                                   | More likely   | 44 (20.2%)  | 137 (49.5%) |              |
| <b>Advised by another farmer to use antimicrobials</b>                                            | Less likely   | 38 (17.5%)  | 46 (16.7%)  | 0.512        |
|                                                                                                   | Neutral       | 134 (61.8%) | 183 (66.3%) |              |
|                                                                                                   | More likely   | 45 (20.7%)  | 47 (17.0%)  |              |
| <b>Role of key actors in monitoring the responsible use of antimicrobials in broilers</b>         |               |             |             |              |
| <b>Veterinarian or para-veterinarian</b>                                                          | Not important | 7 (3.2%)    | 0 (0.0%)    | <b>0.001</b> |
|                                                                                                   | Neutral       | 21 (9.5%)   | 48 (17.2%)  |              |
|                                                                                                   | Important     | 193 (87.3%) | 231 (82.8%) |              |
| <b>Farmer</b>                                                                                     | Not important | 6 (2.7%)    | 5 (1.8%)    | 0.367        |
|                                                                                                   | Neutral       | 36 (16.3%)  | 58 (20.8%)  |              |
|                                                                                                   | Important     | 179 (81.0%) | 216 (77.4%) |              |
| <b>Government</b>                                                                                 | Not important | 4 (1.8%)    | 12 (4.3%)   | <0.001       |
|                                                                                                   | Neutral       | 19 (8.6%)   | 57 (20.3%)  |              |
|                                                                                                   | Important     | 198 (89.6%) | 210 (75.3%) |              |
| <b>Retailer</b>                                                                                   | Not important | 22 (10.0%)  | 45 (16.4%)  | <b>0.009</b> |
|                                                                                                   | Neutral       | 62 (28.2%)  | 96 (35.0%)  |              |
|                                                                                                   | Important     | 136 (61.8%) | 133 (48.5%) |              |
| <b>Economic importance of antimicrobial use for broiler farmers</b>                               |               |             |             |              |
| <b>Does a health issue in the broiler flock have a negative effect on the farm profit margin?</b> | No            | 26 (11.8%)  | 32 (11.6%)  | 0.927        |
|                                                                                                   | Yes           | 194 (88.2%) | 245 (88.4%) |              |
| <b>Does the farm collect any productivity data on the broiler flock?</b>                          | No            | 38 (39.2%)  | 64 (43.0%)  | 0.557        |
|                                                                                                   | Yes           | 59 (60.8%)  | 85 (57.0%)  |              |
| <b>Is there an economic advantage to antimicrobial use?</b>                                       | No            | 63 (28.6%)  | 24 (8.7%)   | <0.001       |
|                                                                                                   | Yes           | 157 (71.4%) | 252 (91.3%) |              |

**Table S2.** Differentiating smaller-scale farms from larger-scale farms with regard to on-farm costs (\$US/1000 birds).

|                      | No. | DOC        | Feed        | Disinfectant | Litter    | Medicines | Labour    | Heating   | Other     | Vaccine   | Total       |
|----------------------|-----|------------|-------------|--------------|-----------|-----------|-----------|-----------|-----------|-----------|-------------|
| <b>Smaller farms</b> | 255 | 570        | 1638        | 11           | 12        | 22        | 66        | 13        | 40        | 12        | <b>2384</b> |
| Central Java         | 33  | 474        | 1401        | 41           | 16        | 35        | 37        | 20        | 15        | 5         | <b>2043</b> |
| Lampung              | 8   | 508        | 952         | 2            | 13        | 21        | 69        | 21        | 0         | 64        | <b>1651</b> |
| West Kalimantan      | 214 | 583        | 1665        | 7            | 12        | 21        | 71        | 13        | 58        | 12        | <b>2442</b> |
| <b>Larger farms</b>  | 254 | 492        | 1381        | 10           | 13        | 23        | 35        | 16        | 19        | 16        | <b>2005</b> |
| Central Java         | 132 | 474        | 1442        | 17           | 18        | 30        | 32        | 20        | 18        | 15        | <b>2067</b> |
| Lampung              | 43  | 463        | 1266        | 1            | 9         | 31        | 31        | 17        | 17        | 20        | <b>1855</b> |
| West Kalimantan      | 79  | 525        | 1349        | 5            | 7         | 12        | 43        | 12        | 26        | 17        | <b>1996</b> |
| <b>Average</b>       |     | <b>536</b> | <b>1522</b> | <b>11</b>    | <b>12</b> | <b>22</b> | <b>47</b> | <b>15</b> | <b>22</b> | <b>14</b> | <b>2201</b> |

**Table S3.** Differentiating contract and independent farmers with regard to on-farm costs (\$US/1000 birds).

|                    | No.        | DOC        | Feed        | Disinfectant | Litter    | Medicines | Labour    | Heating   | Other     | Vaccine   | TOTAL       |
|--------------------|------------|------------|-------------|--------------|-----------|-----------|-----------|-----------|-----------|-----------|-------------|
| <b>Independent</b> | <b>222</b> | <b>568</b> | <b>1668</b> | <b>6</b>     | <b>10</b> | <b>19</b> | <b>61</b> | <b>11</b> | <b>13</b> | <b>13</b> | <b>2370</b> |
| Central Java       | 5          |            |             |              |           |           |           |           |           |           |             |
| Lampung            | 11         | 513        | 1071        | 2            | 12        | 21        | 59        | 18        | 7         | 42        | 1745        |
| West Kalimantan    | 206        | 572        | 1680        | 7            | 10        | 18        | 62        | 11        | 15        | 13        | 2387        |
| <b>Contract</b>    | <b>281</b> | <b>503</b> | <b>1377</b> | <b>2</b>     | <b>14</b> | <b>28</b> | <b>36</b> | <b>18</b> | <b>23</b> | <b>15</b> | <b>2017</b> |
| Central Java       | 159        | 476        | 1436        | 3            | 18        | 32        | 33        | 20        | 18        | 13        | 2049        |
| Lampung            | 40         | 460        | 1272        | 1            | 9         | 31        | 31        | 17        | 27        | 0         | 1848        |
| West Kalimantan    | 82         | 557        | 1333        | 8            | 11        | 22        | 56        | 15        | 70        | 18        | 2089        |

Note: six farmers, one in Central Java and five in West Kalimantan did not identify as either contract or independent farmers. The sample of five independent farmers in Central Java was insufficient to elicit representative data.
